# Supplementary material
Source: PubMed Central journal article supplement (PMC1933407)

# Supplementary Figure S1

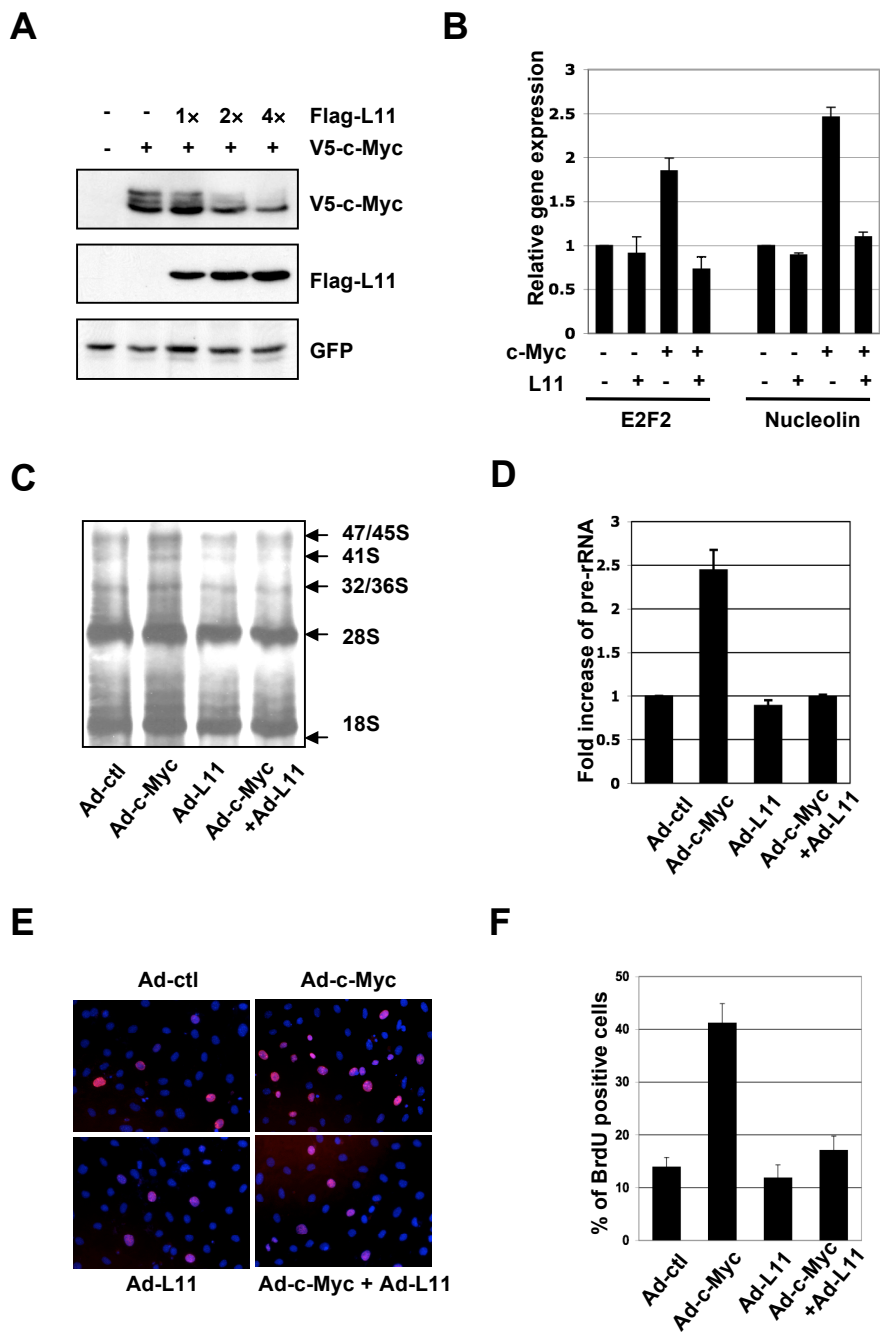

# Supplementary Figure S2

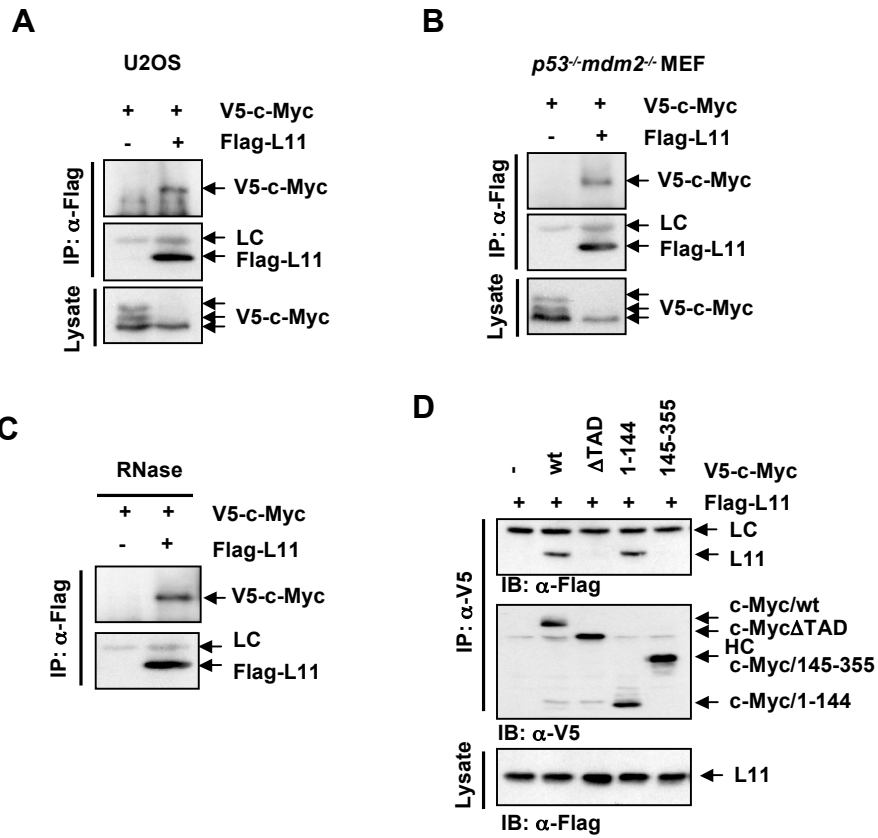

# Supplementary Figure S3

**A**

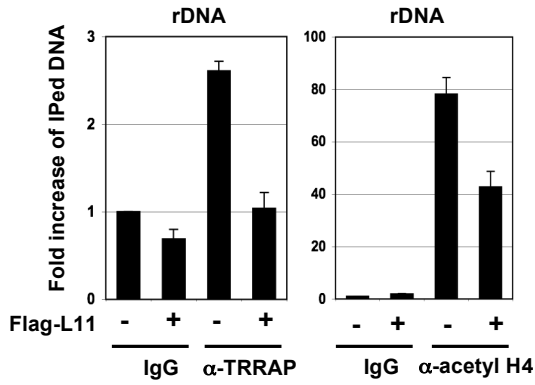

**B**

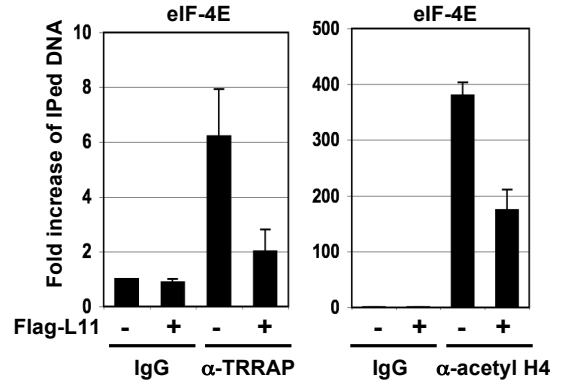

**C**

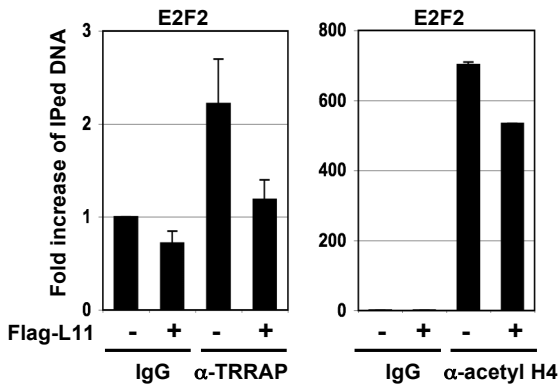

**D**

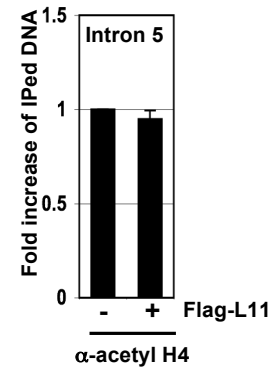

**E**

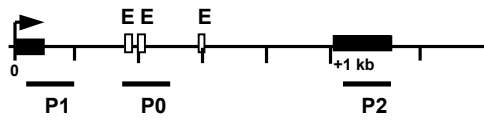

**F**

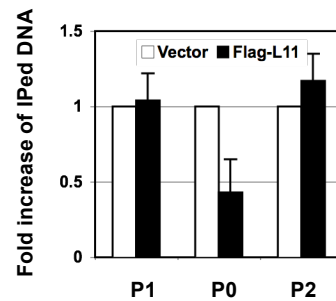

Supplement: 7601776s2.pdf [file 7601776s2.pdf]
